# Supplementary material for: A Degenerative Retinal Process in HIV-Associated Non-Infectious Retinopathy
Source: PubMed Central journal article supplement (PMC3775801; doi:10.1371/journal.pone.0074712), 2013-09-17
Supplement: pone.0074712.s001.pdf [file pone.0074712.s001.pdf]

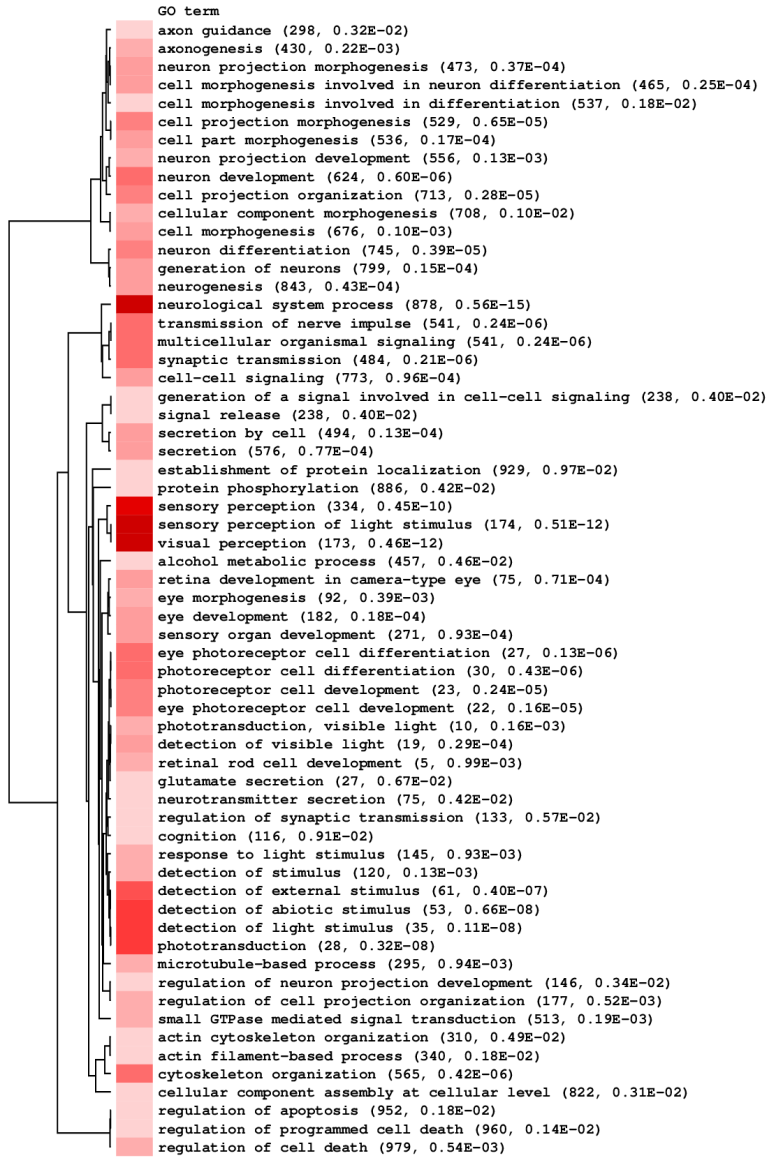

**Figure S1**

Information clustering of significant (Bonferroni adjusted  $p$ -value < 0.01) biological processes in the comparison of HIV-negative and HIV-positive donors. Numbers in parentheses are number of expressed genes in the process and adjusted  $p$ -value. Hue of the red color is proportional to  $(\log) p$ -value; darker color means higher significance.
