# Supplementary material for: A Degenerative Retinal Process in HIV-Associated Non-Infectious Retinopathy
Source: PubMed Central journal article supplement (PMC3775801; doi:10.1371/journal.pone.0074712), 2013-09-17
Supplement: pone.0074712.s003.pdf [file pone.0074712.s003.pdf]

calcium signaling

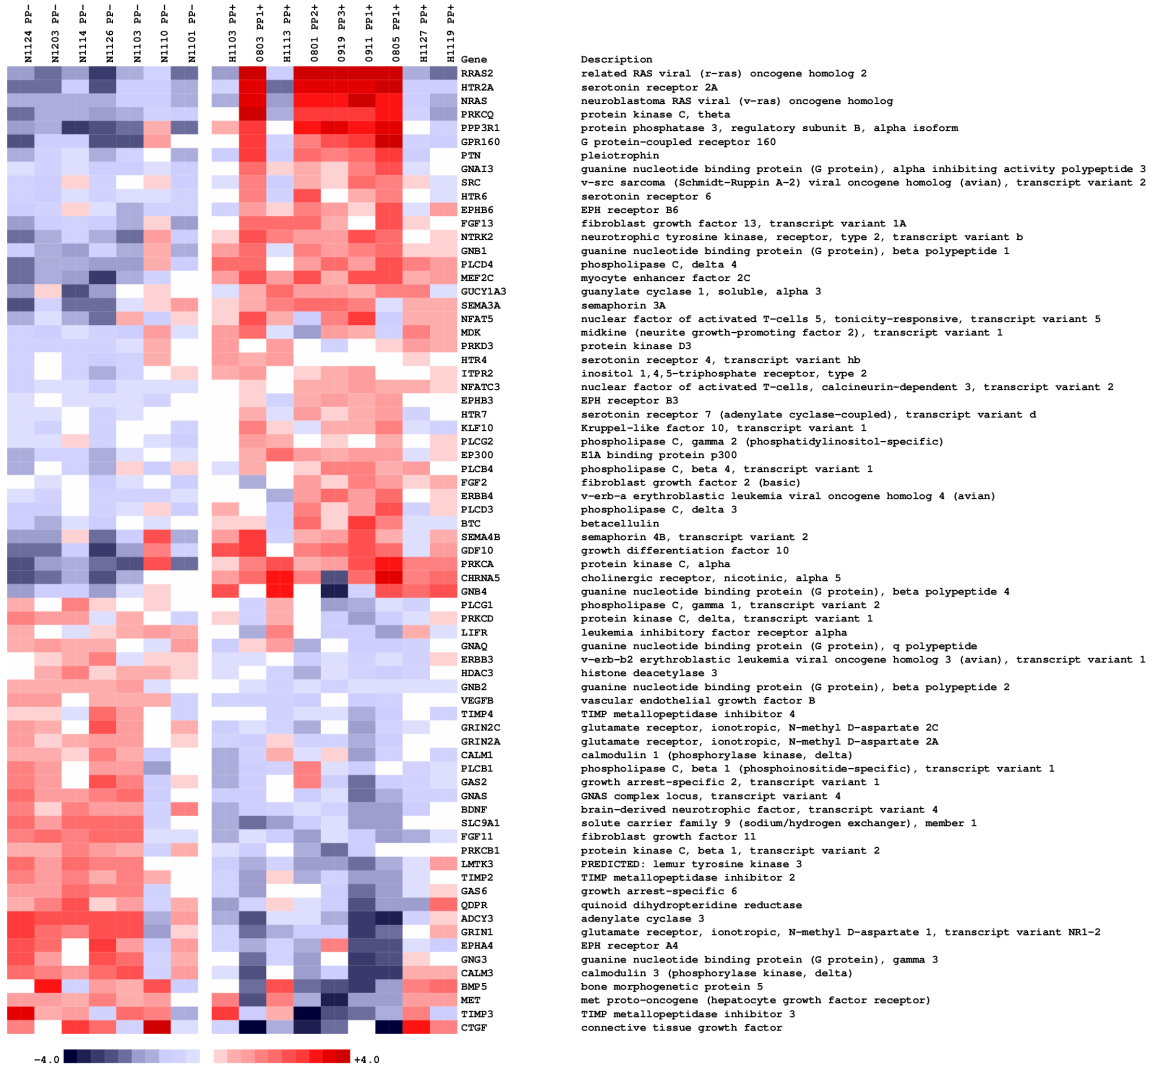

Figure S3

Calcium signaling pathway. Gene expression in HIV-negative (left panel) and HIV-positive donors.
