# Supplementary material for: A Degenerative Retinal Process in HIV-Associated Non-Infectious Retinopathy
Source: PubMed Central journal article supplement (PMC3775801; doi:10.1371/journal.pone.0074712), 2013-09-17
Supplement: pone.0074712.s004.pdf [file pone.0074712.s004.pdf]

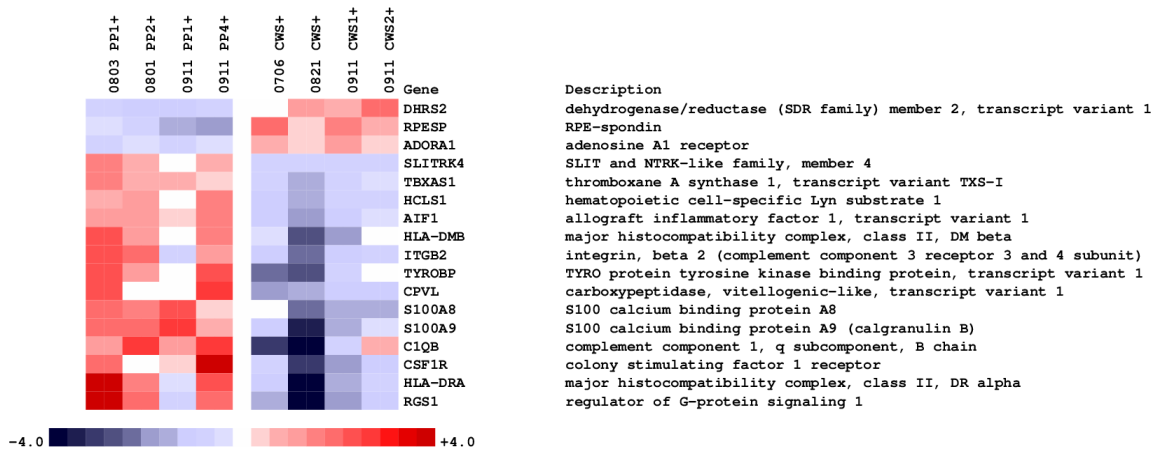

**Gene**  
 DHRS2 dehydrogenase/reductase (SDR family) member 2, transcript variant 1  
 RPESP RPE-spondin  
 ADORA1 adenosine A1 receptor  
 SLITRK4 SLIT and NTRK-like family, member 4  
 TXAS1 thromboxane A synthase 1, transcript variant TXS-I  
 HCLS1 hematopoietic cell-specific Lyn substrate 1  
 AIF1 allograft inflammatory factor 1, transcript variant 1  
 HLA-DMB major histocompatibility complex, class II, DM beta  
 ITGB2 integrin, beta 2 (complement component 3 receptor 3 and 4 subunit)  
 TYROBP TYRO protein tyrosine kinase binding protein, transcript variant 1  
 CPVL carboxypeptidase, vitellogenic-like, transcript variant 1  
 S100A8 S100 calcium binding protein A8  
 S100A9 S100 calcium binding protein A9 (calgranulin B)  
 CIQB complement component 1, q subcomponent, B chain  
 CSF1R colony stimulating factor 1 receptor  
 HLA-DRA major histocompatibility complex, class II, DR alpha  
 RGS1 regulator of G-protein signaling 1

**Figure S4**

Gene expression in HIV-positive samples with CWS (right panel) compared to ophthalmologically normal HIV-positive samples.
