# Supplementary material for: A Degenerative Retinal Process in HIV-Associated Non-Infectious Retinopathy
Source: PubMed Central journal article supplement (PMC3775801; doi:10.1371/journal.pone.0074712), 2013-09-17
Supplement: pone.0074712.s005.pdf [file pone.0074712.s005.pdf]

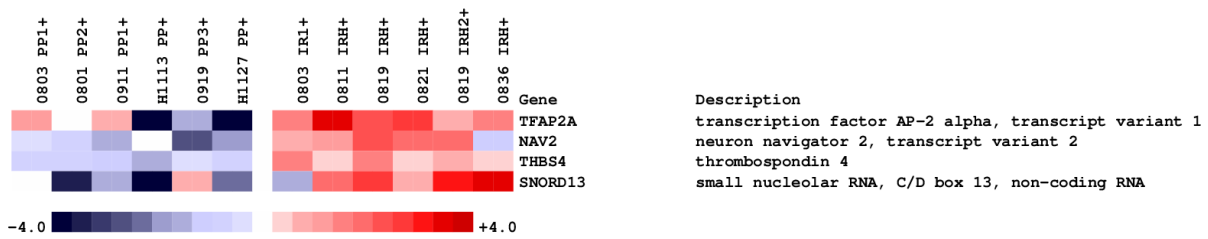

**Figure S5**

Gene expression in HIV-positive samples with IRH (right panel) compared to ophthalmologically normal HIV-positive samples.
